# Supplementary material for: Depletion of the ER chaperone ENPL-1 sensitizes C. elegans to the anticancer drug cisplatin
Source: PubMed Central journal article supplement — Worm. 2013 Jan 1;2(1):e24059. doi: 10.4161/worm.24059 (PMC3670465; doi:10.4161/worm.24059), 2013-01-01
Supplement: worm-2-e24059-s01.pdf [file worm-2-e24059-s01.pdf]

## Supplementary figures and legends

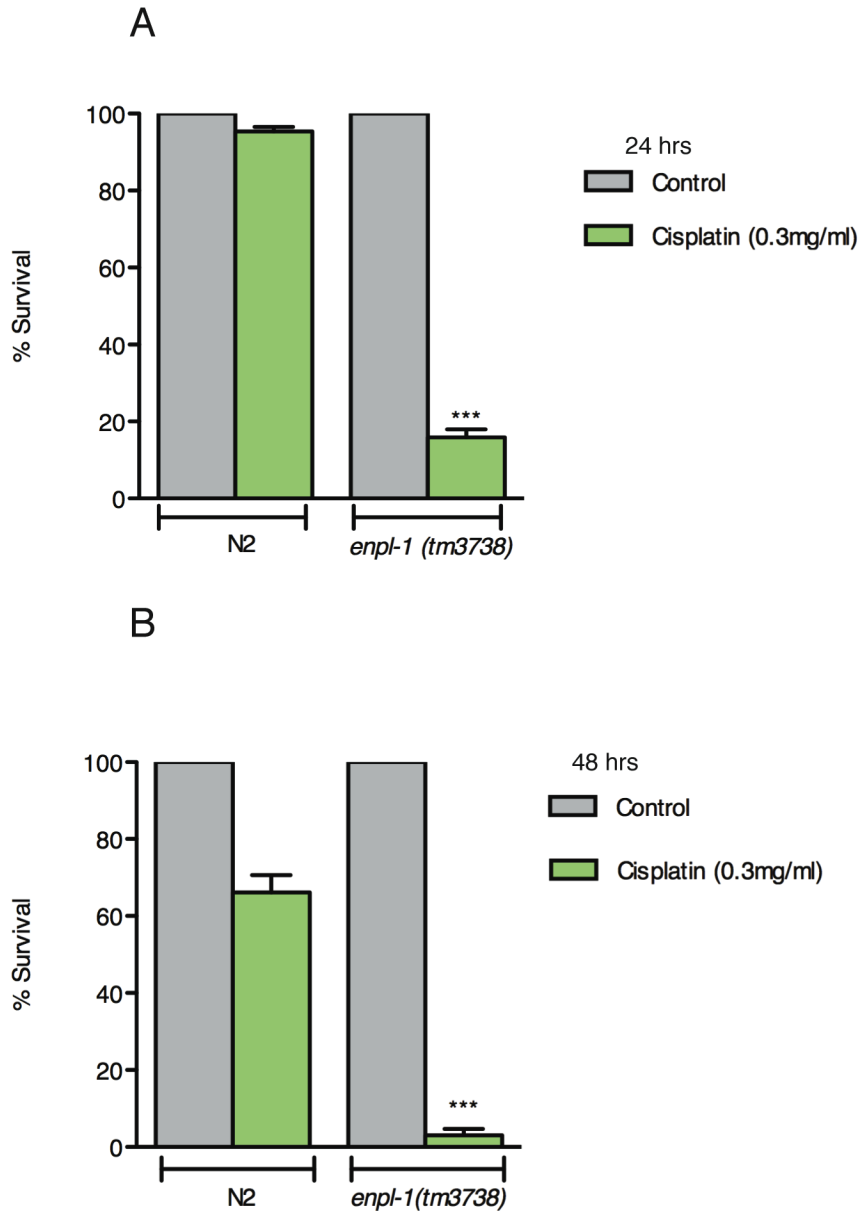

**Figure S1: *enpl-1 (tm3738)* mutants display sensitivity to cisplatin.**

*enpl-1(tm3738)* mutants and wild-type (N2) worms were tested for survival after treatment with cisplatin for 24 hours (A) or 48 hours (B).

Error bars represent the mean  $\pm$ SEM of three experiments (n=80 for each strain/expt tested). Control indicates viability on plates without cisplatin. The cisplatin treated N2 and *enpl-1 (tm3738)* worms were compared using Fisher's exact test. \*\*\* p<0.001.

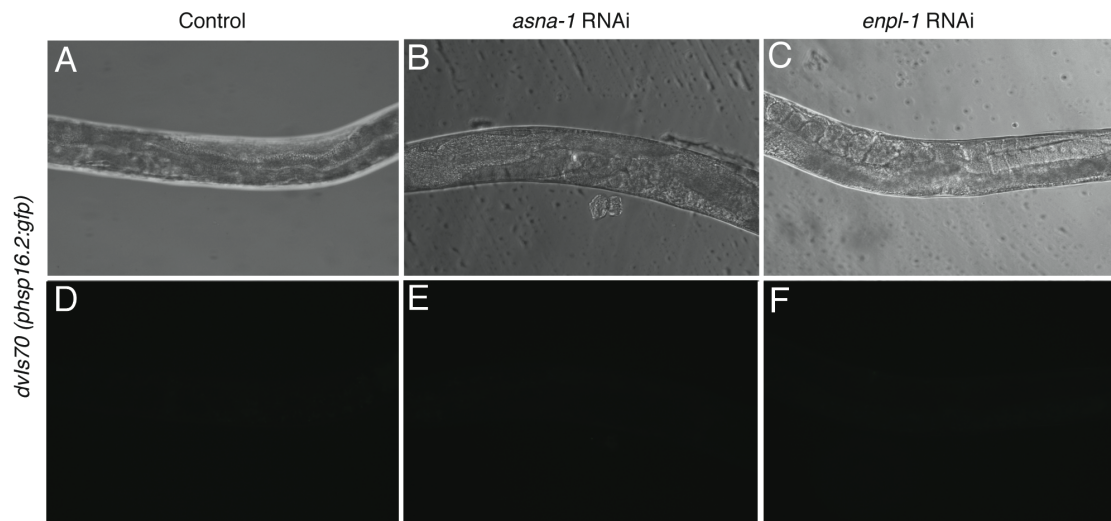

**Figure S2: *enpl-1* and *asna-1* RNAi knock down do not induce heat stress**  
(A)-(C) Light micrographs of the worms carrying the *phsp16.2::GFP* (*dvlis70*) transgene subjected to control RNAi(A), *asna-1* RNAi (B) and *enpl-1* RNAi (C) (n=25). (D)-(F) fluorescence micrographs of the corresponding DIC micrographs of (A)-(C).

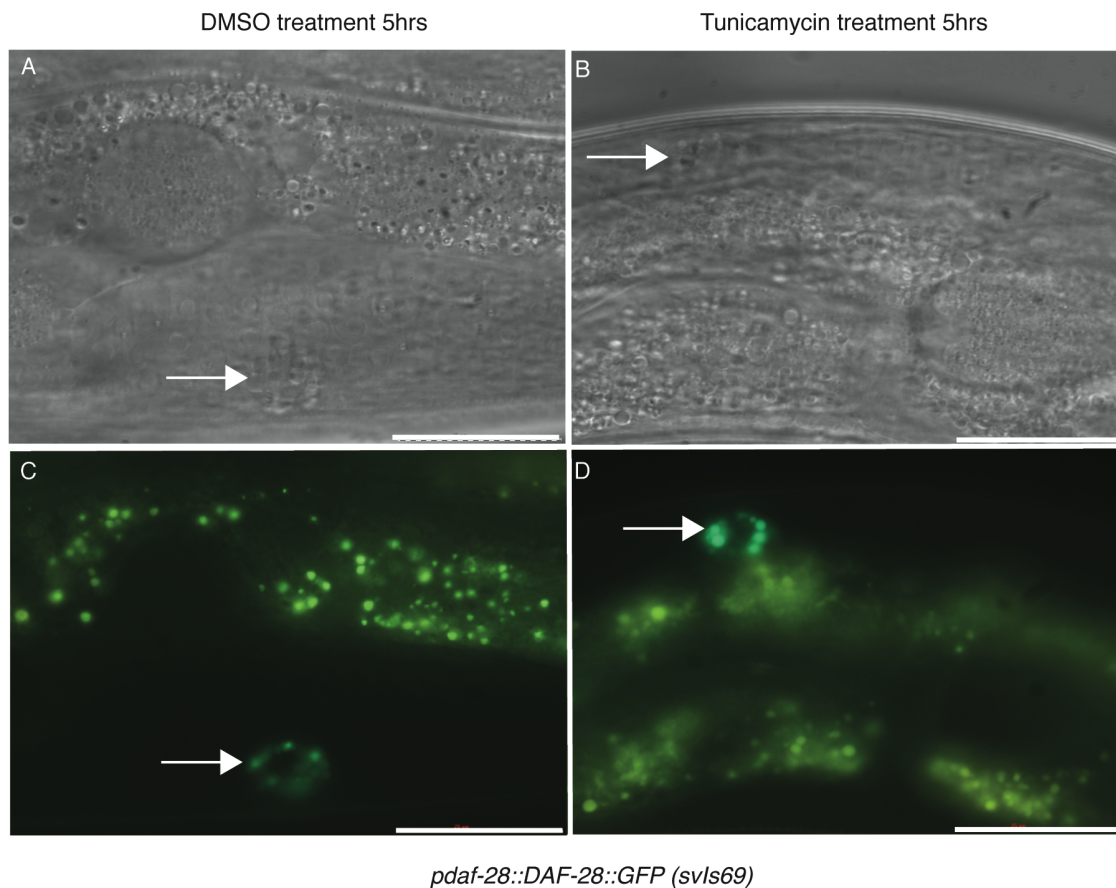

**Figure S3 : Tunicamycin treatment does not decrease DAF-28::GFP secretion**  
 The effect of tunicamycin treatment (56µg/ml for five hours) or DMSO only on the secretion of DAF-28:GFP was assessed in worms carrying the *svls69 (pdaf-28::daf-28::GFP)* transgene and **(B)**: White arrows in DIC micrographs indicate coelomocytes in DMSO treated worms **(A)** or tunicamycin treated worms **(B)**. **(C) and (D)**: Fluorescence micrographs corresponding to A and B respectively, showing uptake of secreted DAF-28::GFP by the coelomocytes (white arrows). Scale bar= 25µm

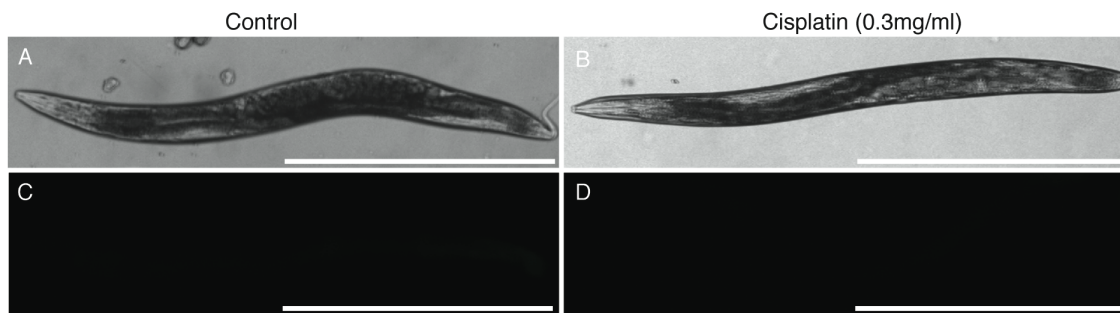

*phsp-6::GFP (zcls13)*

**Figure S4: Cisplatin does not induce mitochondrial stress response in *C. elegans***

Light micrographs of the worms carrying the *phsp-6::GFP(zcls13)* transgene with no treatment (A), 0.3mg/ml of cisplatin (B). (C) and (D): Fluorescence micrographs corresponding to light micrographs (A) and (B) respectively. The scale bar = 500mm

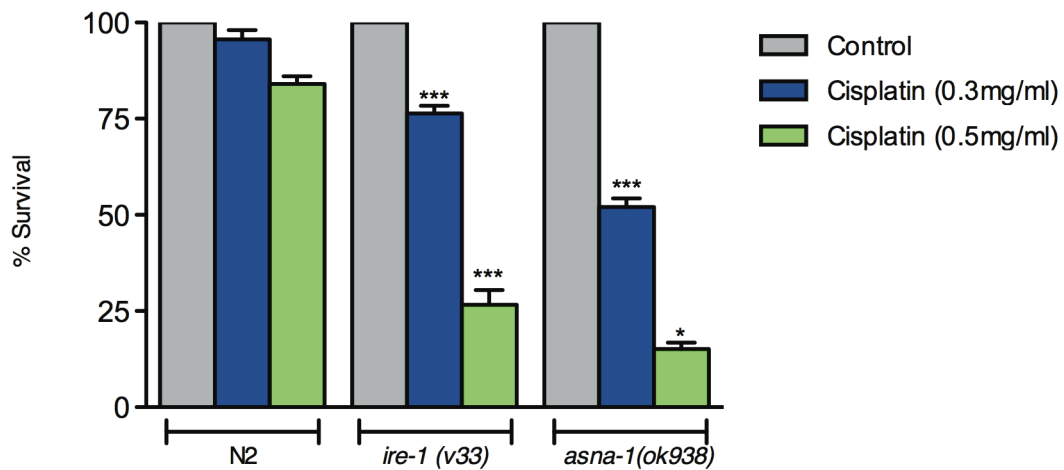

**Figure S5: *ire-1* mutants are sensitive to cisplatin**

The bars the graph represent the mean percent survival of the worms and error bars represent the mean  $\pm$  SEM of three experiments (n=50 for each strain/expt tested). Control indicates viability of worms on plates without cisplatin. The data was analysed using one way ANOVA with Bonferroni multiple comparison post hoc test.

The p values for various pairs are as follows :-

Cisplatin 0.3 mg/ml :  $p < 0.001$  for all comparisons

Cisplatin 0.5 mg/ml :  $p < 0.001$  holds for N2 versus *ire-1(v33)*, N2 versus *asna-1(ok938)*;

$p < 0.05$  holds for *ire-1(v33)* versus *asna-1(ok938)*
